# Supplementary material for: Patients with non-colorectal cancers may be at elevated risk of colorectal neoplasia
Source: PubMed Central journal article supplement (PMC7097953; doi:10.7150/jca.40724), 2020-03-04
Supplement: jcav11p3192s1.pdf [file jcav11p3192s1.pdf]

**Supplemental Table 1.** Number of patients in each age group by cancer status and type.

| Cancer Type             | Age         |             |             |             | Total        |
|-------------------------|-------------|-------------|-------------|-------------|--------------|
|                         | ≤ 40 y      | 41-50       | 51-60y      | > 60 y      |              |
| Breast                  | 232         | 172         | 832         | 804         | <b>2040</b>  |
| Prostate                | 94          | 34          | 242         | 846         | <b>1216</b>  |
| Lymphoma                | 146         | 145         | 318         | 493         | <b>1102</b>  |
| Leukemia                | 224         | 117         | 272         | 353         | <b>966</b>   |
| Non-melanoma skin       | 61          | 35          | 180         | 281         | <b>557</b>   |
| Vulvovaginal and uterus | 68          | 72          | 180         | 207         | <b>527</b>   |
| Melanoma                | 73          | 39          | 140         | 221         | <b>473</b>   |
| Head and neck           | 54          | 25          | 130         | 202         | <b>411</b>   |
| Multiple myeloma        | 41          | 34          | 87          | 161         | <b>323</b>   |
| Lung                    | 27          | 6           | 67          | 223         | <b>323</b>   |
| Endocrine               | 52          | 30          | 114         | 88          | <b>284</b>   |
| Ovary                   | 31          | 30          | 83          | 103         | <b>247</b>   |
| Kidney                  | 27          | 15          | 75          | 101         | <b>218</b>   |
| Urothelial              | 20          | 5           | 33          | 145         | <b>203</b>   |
| Soft tissue             | 35          | 27          | 51          | 80          | <b>193</b>   |
| Liver                   | 9           | 11          | 40          | 77          | <b>137</b>   |
| Pancreas                | 9           | 7           | 30          | 70          | <b>116</b>   |
| Unknown primary         | 8           | 8           | 18          | 38          | <b>72</b>    |
| Total (cancer)          | <b>1211</b> | <b>812</b>  | <b>2892</b> | <b>4493</b> | <b>9408</b>  |
| No cancer               | 410         | 395         | 1614        | 876         | <b>3295</b>  |
| <b>Total</b>            | <b>1621</b> | <b>1207</b> | <b>4506</b> | <b>5369</b> | <b>12703</b> |
